# Supplementary material for: Climate Change Penalty to Ozone Air Quality: Review of Current Understandings and Knowledge Gaps
Source: Springer Nature journal article supplement (doi:10.1007/s40726-019-00115-6), 2019-06-26
Supplement: 40726_2019_115_MOESM1_ESM.pdf [file 40726_2019_115_MOESM1_ESM.pdf]

**Supplementary information**

**Climate Change Penalty to Ozone Air Quality: Review of Current Understandings and Knowledge Gaps**

**Tzung-May Fu<sup>1,2</sup> and Heng Tian<sup>3</sup>**

<sup>1</sup> School of Environmental Science and Engineering, Southern University of Science and Technology, Shenzhen, Guangdong Province, China

<sup>2</sup> Shenzhen Institute of Sustainable Development, Southern University of Science and Technology, Shenzhen, Guangdong Province, China

<sup>3</sup> Department of Atmospheric and Oceanic Sciences, Peking University, Beijing, China

Correspondence to Tzung-May Fu ([fuzm@sustech.edu.cn](mailto:fuzm@sustech.edu.cn))

**Table S1** Model projections of changes in summertime or annual mean ozone air quality due to climate change only, adapted and updated from Jacob and Winner [1] and Fiore et al. [2] to report results from studies since 2015

| Notation in Figure 1 <sup>a</sup> | Reference                   | Domain | Climate scenario <sup>b</sup> | Time horizon and averaging period          | Metric reported                      | Surface ozone change [ppb] <sup>c</sup>                                                                                                                                                     |
|-----------------------------------|-----------------------------|--------|-------------------------------|--------------------------------------------|--------------------------------------|---------------------------------------------------------------------------------------------------------------------------------------------------------------------------------------------|
| A                                 | Fann et al. [3]             | US     | RCP6.0, RCP8.5                | (2025-2035) vs (1995-2005)                 | May-September mean MDA8 <sup>d</sup> | Midwest US and the Great Plains: 0~2.6 (RCP6.0), 0~5.4 (RCP8.5)<br>Southwestern US: 0~1.64 (RCP6.0), 0~0.8 (RCP8.5)                                                                         |
| B                                 | Garcia-Menendez et al. [4]  | US     | POL3.7, POL4.5                | (2035-2065) and (2085-2115) vs (1980-2010) | Population-weighted annual mean MDA8 | US (2035-2065): ~0.5 (POL3.7), ~0.5 (POL4.5)<br>US (2085-2115): ~0.7 (POL3.7), ~0.5 (POL4.5)                                                                                                |
| C                                 | Gonzalez-Abraham et al. [5] | US     | A1B                           | (2045-2054) vs (1995-2004)                 | JJA MDA8                             | Northwestern US: -1<br>Southwestern US: 0.4<br>Central and Southern US: 4.3-4.5<br>Midwest US: 7.2<br>Northeastern US and Southeastern US: 6.1-6.6                                          |
| D                                 | Val Martin et al. [6]       | US     | RCP4.5, RCP8.5                | 2050 decadal mean vs 2000 decadal mean     | Annual mean MDA8                     | Northeastern US: ~2.5 (RCP4.5), ~4 (RCP8.5)<br>Southern and Southeastern US: ~1.5 (RCP4.5), ~3 (RCP8.5)<br>Midwest US: ~2 (RCP4.5), ~1 (RCP8.5)<br>Western US: ~1 (RCP4.5), ~1.5 (RCP8.5)   |
| E                                 | He et al. [7]               | US     | A1B, A1Fi                     | (2048 to 2052) vs (1995 to 1999)           | JJA MDA8 <sup>e</sup>                | Northeastern US: -0.5 (A1B), 4.2 (A1Fi)<br>Southeastern US: 1.6 (A1B), 4 (A1Fi)<br>Midwest US: 0.9 (A1B), 5.8 (A1Fi)<br>California: -0.9 (A1B), 2.5 (A1Fi)<br>Texas: -0.6 (A1B), 3.4 (A1Fi) |

|   |                                |                          |                                                          |                                                                       |                     |                                                                                                                                                                                                                                                                                                                                                       |
|---|--------------------------------|--------------------------|----------------------------------------------------------|-----------------------------------------------------------------------|---------------------|-------------------------------------------------------------------------------------------------------------------------------------------------------------------------------------------------------------------------------------------------------------------------------------------------------------------------------------------------------|
| F | Nolte et al. [8]               | US                       | RCP4.5,<br>RCP6.0,<br>RCP8.5                             | (2025-2035)<br>vs (1995-<br>2005)                                     | JJA MDA8            | All US: 0.2 (RCP4.5), 0.1 (RCP6.0), 1.1 (RCP8.5)<br>Northeastern US: 0.6 (RCP4.5), 0.5 (RCP6.0), 1.8 (RCP8.5)<br>Southern and Southeastern US: -0.4 (RCP4.5), -0.5~-0.4 (RCP6.0),<br>0.2~0.4 (RCP8.5)<br>Midwest US: 0.2~0.7 (RCP4.5), 0.4~1.0 (RCP6.0), 2.1~2.9<br>(RCP8.5)<br>Western US: -0.2~1.3 (RCP4.5), -0.1~0.5 (RCP6.0), 0.2~2.0<br>(RCP8.5) |
| G | Rieder et al. [9]              | Eastern<br>US            | RCP4.5                                                   | (2026-2035),<br>(2046-2055),<br>and (2091-<br>2100) vs<br>(2006-2015) | JJA MDA8            | Eastern US (2026-2035): 1<br>Eastern US (2046-2055): 1<br>Eastern US (2091-2100): 2                                                                                                                                                                                                                                                                   |
| H | Rieder et al. [10]             | US                       | RCP4.5,<br>RCP8.5                                        | (2096-2100)<br>vs (2001-<br>2005)                                     | JJA MDA8            | Northeastern US: ~2 (RCP4.5), +1-4 (RCP8.5)<br>Western US: ~-1 (RCP4.5), ~-2 (RCP8.5)<br>Southeastern US: ~-3 (RCP4.5), ~-4 (RCP8.5)                                                                                                                                                                                                                  |
| I | Lee et al. [11]                | Northern<br>East<br>Asia | A2                                                       | (2046-2055)<br>vs (2016-<br>2025)                                     | Annual<br>MDA8      | Northern East Asia: -8.1~-1.3                                                                                                                                                                                                                                                                                                                         |
| J | Pommier et al. 2018            | India                    | RCP8.5                                                   | (2045-2055)<br>vs (2006-<br>2015)                                     | Annual<br>mean      | Northern India: +2<br>Southern India: -1.4                                                                                                                                                                                                                                                                                                            |
| K | Lacressonniere et al.<br>[12]  | Europe                   | +2°C<br>(reached<br>along 2031-<br>2080 under<br>RCP4.5) | (2031-2080)<br>vs (1971-<br>2000)                                     | SOMO35 <sup>f</sup> | Europe: -200~1000 [ppb · day] <sup>g</sup>                                                                                                                                                                                                                                                                                                            |
| L | Fortems-Cheiney et<br>al. [13] | Europe                   | +2°C<br>(reached                                         | (2028-2057)<br>vs (1971-                                              | Annual<br>mean      | Europe: -1.1 (2°C), 2.2 (3°C)                                                                                                                                                                                                                                                                                                                         |

|   |                       |        |                                                                            |                                        |             |                                                                                                                                                                                                                                                                         |
|---|-----------------------|--------|----------------------------------------------------------------------------|----------------------------------------|-------------|-------------------------------------------------------------------------------------------------------------------------------------------------------------------------------------------------------------------------------------------------------------------------|
|   |                       |        | along 2028-2057 under RCP4.5), +3°C (reached along 2040-2069 under RCP8.5) | 2000), (2040-2069) vs (1971-2000)      |             |                                                                                                                                                                                                                                                                         |
| M | Schnell et al. [14]   | Global | RCP8.5                                                                     | 2100 decadal mean vs 2000 decadal mean | JJA MDA8    | Western North America: -2.1~5 <sup>h</sup><br>Eastern North America: -2.2~7.1 <sup>h</sup><br>Northern Europe: -3.9~2 <sup>h</sup><br>Southern Europe: -1.3~9.3 <sup>h</sup><br>Northern East Asia: -2.5~3.1 <sup>h</sup><br>Southern East Asia: -4.7~-0.8 <sup>h</sup> |
| N | Glotfelty et al. [15] | Global | A1B                                                                        | 2050 vs 2001                           | Annual MDA8 | Western North America: 0 ~ 3<br>Eastern North America: -0.8~0<br>Northern Europe: -1.4 ~ 1.6<br>Southern Europe: 0.4 ~ 2<br>East Asia: 0~3<br>South Asia: 0.8 ~ 1.6<br>Global: 0.6                                                                                      |

<sup>a</sup> Results are shown in Figure 1 and denoted with alphabets.

<sup>b</sup> RCP4.5, RCP6.0, and RCP8.5, are different climate scenarios by which the global mean radiative forcings reach 4.5, 6.0, and 8.5 W m<sup>-2</sup>, respectively, in the year 2100 [16]. POL3.7 and POL4.5 denote stabilization scenarios that assume a uniform global carbon tax to achieve total radiative forcings of 3.7 and 4.5 W m<sup>-2</sup> by 2100, respectively [4]. A1B, A1FI, and A2 are socio-economic scenarios for GHG emissions used in the IPCC Fourth Assessment Report [17] that represented rapid economic growth and efficient introduction of new technologies, with differences in technological emphasis.

<sup>c</sup> Concentration changes reported in ppb unless otherwise specified.

<sup>d</sup> Maximum daily 8-h average ozone concentration.

<sup>e</sup> JJA denotes June, July, and August.

<sup>f</sup> SOMO35 is defined as the cumulative exceedance of the daily maximum 8-h averaged ozone over 35 ppb integrated over a year.

<sup>g</sup> Ranges reported is the range projected by four regional models.

<sup>h</sup> Ranges reported are the ranges projected by four global models.

## References

1. Jacob, D.J. and D.A. Winner, *Effect of climate change on air quality*. Atmospheric Environment, 2009. **43**(1): p. 51-63.
2. Fiore, A.M., et al., *Global air quality and climate*. Chemical Society Reviews, 2012. **41**(19): p. 6663-6683.
3. Fann, N., et al., *The geographic distribution and economic value of climate change-related ozone health impacts in the United States in 2030*. Journal of the Air & Waste Management Association, 2015. **65**(5): p. 570-580.
4. Garcia-Menendez, F., et al., *US Air Quality and Health Benefits from Avoided Climate Change under Greenhouse Gas Mitigation*. Environmental Science & Technology, 2015. **49**(13): p. 7580-7588.
5. Gonzalez-Abraham, R., et al., *The effects of global change upon United States air quality*. Atmos. Chem. Phys., 2015. **15**(21): p. 12645-12665.
6. Val Martin, M., et al., *How emissions, climate, and land use change will impact mid-century air quality over the United States: a focus on effects at national parks*. Atmospheric Chemistry and Physics, 2015. **15**(5): p. 2805-2823.
7. He, H., et al., *Future US ozone projections dependence on regional emissions, climate change, long-range transport and differences in modeling design*. Atmospheric Environment, 2016. **128**: p. 124-133.
8. Nolte, C.G., et al., *The potential effects of climate change on air quality across the conterminous US at 2030 under three Representative Concentration Pathways*. Atmospheric Chemistry and Physics, 2018. **18**(20): p. 15471-15489.
9. Rieder, H.E., et al., *Projecting policy-relevant metrics for high summertime ozone pollution events over the eastern United States due to climate and emission changes during the 21st century*. Journal of Geophysical Research-Atmospheres, 2015. **120**(2): p. 784-800.
10. Rieder, H.E., et al., *Combining model projections with site-level observations to estimate changes in distributions and seasonality of ozone in surface air over the USA*. Atmospheric Environment, 2018. **193**: p. 302-315.
11. Lee, J.B., et al., *Projections of summertime ozone concentration over East Asia under multiple IPCC SRES emission scenarios*. Atmospheric Environment, 2015. **106**: p. 335-346.
12. Lacressonniere, G., et al., *Impacts of regional climate change on air quality projections and associated uncertainties*. Climatic Change, 2016. **136**(2): p. 309-324.
13. Fortems-Cheiney, A., et al., *A 3 degrees C global RCP8.5 emission trajectory cancels benefits of European emission reductions on air quality*. Nature

Communications, 2017. **8**: p. 6.

14. Schnell, J.L., et al., *Effect of climate change on surface ozone over North America, Europe, and East Asia*. Geophysical Research Letters, 2016. **43**(7): p. 3509-3518.
15. Glotfelty, T., et al., *Changes in future air quality, deposition, and aerosol-cloud interactions under future climate and emission scenarios*. Atmospheric Environment, 2016. **139**: p. 176-191.
16. van Vuuren, D.P., et al., *The representative concentration pathways: an overview*. Climatic Change, 2011. **109**(1): p. 5.
17. Nakicenovic, N., et al., *IPCC Special Report on Emission Scenarios*, N. Nakicenovic and R. Swart, Editors. 2000: Cambridge, UK and New York, NY.
